# Supplementary material for: Partition of electronic excitation energies: the IQA/EOM-CCSD method
Source: Royal Society of Chemistry journal article supplement (doi:10.1039/c9cp00530g), 2019-01-01
Supplement: c9cp00530g1.pdf [file c9cp00530g1.pdf]

# Partition of electronic excitation energies: the IQA/EOM-CCSD method

Alberto Fernández-Alarcón,<sup>a,b</sup> José Luis Casalz-Sainz,<sup>b</sup> José Manuel Guevara-Vela,<sup>b</sup>  
Aurora Costales,<sup>b</sup> Evelio Francisco<sup>b</sup> Ángel Martín Pendás,<sup>b</sup> Tomás Rocha Rinza<sup>a\*</sup>

<sup>a</sup>Institute of Chemistry, National Autonomous University of Mexico,  
04510 Mexico City, Mexico.

<sup>b</sup>Departament of Analytical and Physical Chemistry,  
University of Oviedo, E-33006, Oviedo, Spain.

## 1 XYZ coordinates

### 1.1 Nitrogen

Table 1: xyz coordinates, in (Å), for the nitrogen molecule computed with the CCSD/Sadlej-plus approximation as implemented in the Psi4 program.

|   | <i>x</i> | <i>y</i> | <i>z</i> |
|---|----------|----------|----------|
| N | 0.000    | 0.000    | -0.557   |
| N | 0.000    | 0.000    | 0.557    |

### 1.2 Carbon monoxide

Table 2: xyz coordinates, in Å, for the carbon monoxide molecule computed with the CCSD/Sadlej-pVTZ approximation as implemented in the Psi4 program.

|   | <i>x</i> | <i>y</i> | <i>z</i> |
|---|----------|----------|----------|
| C | 0.000    | 0.000    | 0.648    |
| O | 0.000    | 0.000    | -0.486   |

### 1.3 Water

Table 3: xyz coordinates, in Å, for the water molecule as reported in reference [39] in the main body of the paper.

|   | $x$   | $y$    | $z$    |
|---|-------|--------|--------|
| O | 0.000 | 0.000  | 0.118  |
| H | 0.000 | 0.758  | -0.473 |
| H | 0.000 | -0.758 | -0.473 |

### 1.4 Ethylene

Table 4: xyz coordinates, in Å, for the ethylene as reported in reference [42] in the main body of the paper.

|   | $x$   | $y$    | $z$    |
|---|-------|--------|--------|
| C | 0.000 | 0.000  | 0.670  |
| C | 0.000 | 0.000  | -0.670 |
| H | 0.000 | 0.926  | 1.235  |
| H | 0.000 | -0.926 | 1.235  |
| H | 0.000 | 0.926  | -1.235 |
| H | 0.000 | -0.926 | -1.235 |

### 1.5 Methane

Table 5: xyz coordinates, in Å, for the methane molecule computed with the MP2/aug-cc-pVTZ approximation as implemented in the Psi4 program.

|   | $x$    | $y$    | $z$    |
|---|--------|--------|--------|
| C | 0.000  | 0.000  | 0.000  |
| H | 0.885  | 0.000  | 0.626  |
| H | 0.000  | -0.885 | -0.626 |
| H | 0.000  | 0.885  | -0.626 |
| H | -0.885 | 0.000  | 0.626  |

## 2 QTAIM analysis and IQA partition for the ground and excited states

### 2.1 Nitrogen

Table 6: QTAIM charges and delocalisation indexes as well as the IQA energy partition of the ground state and the examined excited states of the N<sub>2</sub> molecule. Atomic units are used throughout.

|                                 | GS      | 1 <sup>1</sup> Π <sub>g</sub> | 1 <sup>1</sup> Σ <sub>u</sub> <sup>-</sup> | 1 <sup>1</sup> Δ <sub>u</sub> | 1 <sup>1</sup> Π <sub>u</sub> | 2 <sup>1</sup> Π <sub>u</sub> |
|---------------------------------|---------|-------------------------------|--------------------------------------------|-------------------------------|-------------------------------|-------------------------------|
| DI(N, N)                        | 2.073   | 1.948                         | 1.927                                      | 1.974                         | 2.352                         | 2.304                         |
| $q^{\text{N}}$                  | 0.000   | 0.000                         | 0.000                                      | 0.000                         | 0.002                         | 0.001                         |
| $E_{\text{class}}^{\text{N,N}}$ | 0.243   | 0.275                         | 0.270                                      | 0.271                         | 0.439                         | 0.341                         |
| $E_{\text{xc}}^{\text{N,N}}$    | -0.719  | -0.660                        | -0.656                                     | -0.671                        | -0.793                        | -0.698                        |
| $E_{\text{net}}^{\text{N}}$     | -54.407 | -54.277                       | -54.263                                    | -54.249                       | -54.234                       | -54.218                       |

### 2.1 Carbon monoxide

Table 7: QTAIM charges and delocalisation indexes as well as the IQA energy partition of the ground state and the examined excited states of the CO molecule. Atomic units are used throughout.

|                                 | GS      | 1 <sup>1</sup> Π | 1 <sup>1</sup> Σ <sup>-</sup> | 2 <sup>1</sup> Σ <sup>+</sup> |
|---------------------------------|---------|------------------|-------------------------------|-------------------------------|
| DI(C, O)                        | 1.426   | 1.622            | 1.181                         | 1.171                         |
| $q^{\text{C}}$                  | 1.187   | 0.898            | 0.745                         | 0.769                         |
| $q^{\text{O}}$                  | 1.188   | -0.897           | -0.745                        | -0.769                        |
| $E_{\text{class}}^{\text{C,O}}$ | -1.244  | -0.712           | -0.686                        | -0.706                        |
| $E_{\text{xc}}^{\text{C,O}}$    | -0.441  | -0.495           | -0.368                        | -0.366                        |
| $E_{\text{net}}^{\text{C}}$     | -36.962 | -37.010          | -37.169                       | -37.151                       |
| $E_{\text{net}}^{\text{O}}$     | -74.428 | -74.539          | -74.483                       | -74.479                       |

Table 8: Continuation of Table 7.

|                          | $3^1\Sigma^+$ | $2^1\Sigma^-$ | $4^1\Sigma^+$ | $3^1\Sigma^-$ |
|--------------------------|---------------|---------------|---------------|---------------|
| DI(C, O)                 | 1.952         | 1.789         | 1.450         | 1.373         |
| $q^C$                    | 1.189         | 1.004         | 1.290         | 1.340         |
| $q^O$                    | -1.181        | -0.993        | -1.290        | -1.340        |
| $E_{\text{class}}^{C,O}$ | -1.064        | -1.046        | -1.031        | -1.043        |
| $E_{\text{xc}}^{C,O}$    | -0.492        | -0.503        | -0.380        | -0.371        |
| $E_{\text{net}}^C$       | -36.634       | -36.569       | -36.745       | -36.747       |
| $E_{\text{net}}^O$       | -74.394       | -74.453       | -74.388       | -74.381       |

## 2.3 Water

Table 9: QTAIM charges and delocalisation indexes as well as the IQA energy partition of the ground state and the examined excited states of the H<sub>2</sub>O molecule. Atomic units are used throughout.

|                          | GS      | $1^1B_2$ | $1^1A_2$ | $1^1A_1$ | $1^1B_1$ |
|--------------------------|---------|----------|----------|----------|----------|
| DI(O, H)                 | 0.603   | 0.634    | 0.477    | 0.619    | 0.458    |
| DI(H, H)                 | 0.021   | 0.148    | 0.391    | 0.096    | 0.374    |
| $q^O$                    | -1.159  | -0.878   | -0.560   | -1.052   | -0.686   |
| $q^H$                    | 0.580   | 0.439    | 0.280    | 0.526    | 0.343    |
| $E_{\text{class}}^{H,H}$ | 0.137   | 0.127    | 0.113    | 0.153    | 0.135    |
| $E_{\text{xc}}^{H,H}$    | -0.003  | -0.011   | -0.022   | -0.007   | -0.021   |
| $E_{\text{class}}^{O,H}$ | -0.315  | -0.235   | -0.188   | -0.296   | -0.236   |
| $E_{\text{xc}}^{O,H}$    | -0.193  | -0.164   | -0.145   | -0.150   | -0.130   |
| $E_{\text{net}}^O$       | -74.800 | -74.754  | -74.805  | -74.672  | -74.744  |
| $E_{\text{net}}^H$       | -0.297  | -0.284   | -0.280   | -0.247   | -0.245   |

Table 10: Continuation of Table 9.

|                                 | $2^1A_2$ | $2^1B_2$ | $2^1B_1$ | $3^1B_1$ | $2^1A_1$ |
|---------------------------------|----------|----------|----------|----------|----------|
| DI(O, H)                        | 0.642    | 0.418    | 0.505    | 0.552    | 0.577    |
| DI(H, H)                        | 0.072    | 0.010    | 0.013    | 0.144    | 0.048    |
| $q^O$                           | -0.968   | -1.487   | -1.367   | -1.091   | -1.224   |
| $q^H$                           | 0.484    | 0.744    | 0.682    | 0.545    | 0.612    |
| $E_{\text{class}}^{\text{H,H}}$ | 0.115    | 0.208    | 0.184    | 0.164    | 0.184    |
| $E_{\text{xc}}^{\text{H,H}}$    | -0.008   | -0.001   | -0.002   | -0.012   | -0.003   |
| $E_{\text{class}}^{\text{O,H}}$ | -0.181   | -0.398   | -0.362   | -0.259   | -0.360   |
| $E_{\text{xc}}^{\text{O,H}}$    | -0.172   | -0.132   | -0.152   | -0.130   | -0.141   |
| $E_{\text{net}}^O$              | -74.706  | -74.519  | -74.491  | -74.712  | -74.492  |
| $E_{\text{net}}^H$              | -0.269   | -0.207   | -0.220   | -0.215   | -0.196   |

## 2.4 Ethylene

Table 11: QTAIM charges and delocalisation indexes as well as the IQA energy partition of the ground state and the examined excited states of the  $C_2H_4$  molecule. The labelling of the atoms is shown in Figure 1 in the body of the manuscript. Atomic units are used throughout.

|                        | GS      | $1^1B_{1u}$ | $1^1B_{3g}$ | $1^1B_{3u}$ | $1^1B_{2g}$ | $2^1B_{1u}$ |
|------------------------|---------|-------------|-------------|-------------|-------------|-------------|
| $DI(C_1, C_2)$         | 1.335   | 1.468       | 1.268       | 1.690       | 1.268       | 1.294       |
| $DI(C_1, H_3)$         | 0.802   | 0.810       | 0.755       | 0.777       | 0.787       | 0.795       |
| $DI(C_1, H_5)$         | 0.059   | 0.077       | 0.040       | 0.103       | 0.049       | 0.068       |
| $DI(H_3, H_4)$         | 0.050   | 0.039       | 0.130       | 0.044       | 0.114       | 0.084       |
| $DI(H_3, H_5)$         | 0.024   | 0.031       | 0.123       | 0.033       | 0.096       | 0.082       |
| $DI(H_3, H_5)$         | 0.019   | 0.020       | 0.096       | 0.027       | 0.079       | 0.067       |
| $q^H$                  | 0.046   | 0.141       | -0.007      | 0.096       | 0.021       | 0.042       |
| $q^C$                  | -0.091  | -0.280      | 0.020       | -0.191      | -0.033      | -0.077      |
| $E_{class}^{C_1, C_2}$ | 0.064   | 0.076       | 0.070       | 0.072       | 0.071       | 0.073       |
| $E_{xc}^{C_1, C_2}$    | -0.433  | -0.422      | -0.414      | -0.456      | -0.412      | -0.415      |
| $E_{class}^{C_1, H_3}$ | 0.038   | 0.029       | 0.034       | 0.033       | 0.034       | 0.032       |
| $E_{xc}^{C_1, H_3}$    | -0.258  | -0.249      | -0.242      | -0.251      | -0.246      | -0.246      |
| $E_{class}^{C_1, H_5}$ | 0.002   | 0.004       | 0.008       | 0.003       | 0.008       | 0.007       |
| $E_{xc}^{C_1, H_5}$    | -0.007  | -0.007      | -0.005      | -0.010      | -0.005      | -0.007      |
| $E_{class}^{H_3, H_4}$ | 0.004   | 0.014       | 0.010       | 0.009       | 0.012       | 0.011       |
| $E_{xc}^{H_3, H_4}$    | -0.006  | -0.004      | -0.008      | -0.005      | -0.010      | -0.007      |
| $E_{class}^{H_3, H_5}$ | 0.001   | 0.007       | 0.005       | 0.004       | 0.005       | 0.005       |
| $E_{xc}^{H_3, H_5}$    | -0.002  | -0.004      | -0.010      | -0.003      | -0.005      | -0.007      |
| $E_{class}^{H_3, H_6}$ | 0.001   | 0.006       | 0.003       | 0.003       | 0.004       | 0.003       |
| $E_{xc}^{H_3, H_6}$    | -0.001  | -0.001      | -0.004      | -0.002      | -0.003      | -0.003      |
| $E_{net}^C$            | -37.612 | -37.533     | -37.560     | -37.499     | -37.561     | -37.558     |
| $E_{net}^H$            | -0.466  | -0.438      | -0.443      | -0.448      | -0.443      | -0.446      |

## 2.5 Methane

Table 12: Average of QTAIM charges and delocalisation indexes as well as the IQA energy partition of the investigated electronic systems of CH<sub>4</sub>. Atomic units are used throughout.

|                                                 | GS      |         | 1 <sup>1</sup> T <sub>2</sub> |         | 1 <sup>1</sup> A <sub>2</sub> |
|-------------------------------------------------|---------|---------|-------------------------------|---------|-------------------------------|
| $\langle \text{DI}(\text{C}, \text{H}) \rangle$ | 0.798   | 0.760   | 0.760                         | 0.760   | 0.772                         |
| $\langle \text{DI}(\text{H}, \text{H}) \rangle$ | 0.054   | 0.102   | 0.100                         | 0.100   | 0.121                         |
| $\langle q^{\text{C}} \rangle$                  | -0.083  | -0.420  | -0.418                        | -0.418  | -0.415                        |
| $\langle q^{\text{H}} \rangle$                  | 0.021   | 0.105   | 0.104                         | 0.104   | 0.103                         |
| $\langle E_{\text{class}}^{\text{C,H}} \rangle$ | 0.037   | 0.014   | 0.015                         | 0.015   | 0.018                         |
| $\langle E_{\text{xc}}^{\text{C,H}} \rangle$    | -0.256  | -0.226  | -0.226                        | -0.226  | -0.226                        |
| $\langle E_{\text{class}}^{\text{H,H}} \rangle$ | 0.003   | 0.020   | 0.019                         | 0.019   | 0.021                         |
| $\langle E_{\text{xc}}^{\text{H,H}} \rangle$    | -0.007  | -0.009  | -0.008                        | -0.008  | -0.010                        |
| $E_{\text{net}}^{\text{C}}$                     | -37.614 | -37.570 | -37.570                       | -37.570 | -37.567                       |
| $\langle E_{\text{net}}^{\text{H}} \rangle$     | -0.469  | -0.413  | -0.413                        | -0.413  | -0.405                        |

Table 13: Continuation of Table 12

|                                                 | 1 <sup>1</sup> E |         | 2 <sup>1</sup> T <sub>2</sub> |         |         |
|-------------------------------------------------|------------------|---------|-------------------------------|---------|---------|
| $\langle \text{DI}(\text{C}, \text{H}) \rangle$ | 0.791            | 0.788   | 0.793                         | 0.771   | 0.771   |
| $\langle \text{DI}(\text{H}, \text{H}) \rangle$ | 0.089            | 0.090   | 0.040                         | 0.037   | 0.037   |
| $\langle q^{\text{C}} \rangle$                  | -0.513           | -0.499  | -0.982                        | -1.053  | -1.053  |
| $\langle q^{\text{H}} \rangle$                  | 0.128            | 0.125   | 0.245                         | 0.262   | 0.262   |
| $\langle E_{\text{class}}^{\text{C,H}} \rangle$ | 0.017            | 0.017   | -0.010                        | -0.013  | -0.013  |
| $\langle E_{\text{xc}}^{\text{C,H}} \rangle$    | -0.229           | -0.228  | -0.228                        | -0.227  | -0.227  |
| $\langle E_{\text{class}}^{\text{H,H}} \rangle$ | 0.019            | 0.019   | 0.029                         | 0.029   | 0.029   |
| $\langle E_{\text{xc}}^{\text{H,H}} \rangle$    | -0.008           | -0.008  | -0.005                        | -0.005  | -0.005  |
| $E_{\text{net}}^{\text{C}}$                     | -37.532          | -37.533 | -37.484                       | -37.474 | -37.474 |
| $\langle E_{\text{net}}^{\text{H}} \rangle$     | -0.402           | -0.402  | -0.401                        | -0.403  | -0.403  |

## 2.6 Helium dimer

Table 14: IQA partition of the excitation energy ( $E_h$ ) of GS, in net as well as classical and exchange-correlation interatomic components, as a function of distance ( $\text{\AA}$ ) between the helium atoms in the excimer formation. We also present the changes in the delocalisation index (au) for each point.

| Distance $\text{\AA}$ | DI(He, He) | $E_{\text{class}}^{\text{He,He}}$ | $E_{\text{xc}}^{\text{He,He}}$ | $E_{\text{net}}$ | $E$   | $E_{\text{MRCC}}$ |
|-----------------------|------------|-----------------------------------|--------------------------------|------------------|-------|-------------------|
| 0.800                 | 0.409      | 0.07                              | -0.14                          | -2.69            | -5.45 | -5.45             |
| 1.047                 | 0.245      | 0.02                              | -0.08                          | -2.80            | -5.65 | -5.65             |
| 1.072                 | 0.234      | 0.01                              | -0.07                          | -2.80            | -5.67 | -5.67             |
| 1.200                 | 0.185      | 0.01                              | -0.05                          | -2.83            | -5.71 | -5.71             |
| 1.400                 | 0.130      | 0.00                              | -0.03                          | -2.86            | -5.75 | -5.75             |
| 1.600                 | 0.092      | 0.00                              | -0.02                          | -2.87            | -5.77 | -5.77             |
| 1.800                 | 0.063      | 0.00                              | -0.01                          | -2.88            | -5.77 | -5.77             |
| 2.000                 | 0.043      | 0.00                              | -0.01                          | -2.88            | -5.78 | -5.78             |
| 2.970                 | 0.004      | 0.00                              | 0.00                           | -2.89            | -5.78 | -5.78             |
| 3.000                 | 0.004      | 0.00                              | 0.00                           | -2.89            | -5.78 | -5.78             |
| 4.000                 | 0.000      | 0.00                              | 0.00                           | -2.89            | -5.78 | -5.78             |
| 5.000                 | 0.000      | 0.00                              | 0.00                           | -2.89            | -5.78 | -5.78             |
